1 **Gammaretroviruses, novel viruses and pathogenic bacteria in Australian**  
2 **bats with neurological signs, pneumonia and skin lesions**

3

4 Kate Van Brussel<sup>1</sup>, Jackie E. Mahar<sup>1</sup>, Jane Hall<sup>2</sup>, Hannah Bender<sup>2</sup>, Ayda Susana Ortiz-Baez<sup>1</sup>,  
5 Wei-Shan Chang<sup>1</sup>, Edward C. Holmes<sup>1\*</sup> and Karrie Rose<sup>2\*</sup>

6

7 <sup>1</sup>Sydney Institute for Infectious Diseases, School of Medical Sciences, The University of  
8 Sydney, NSW, 2006, Australia.

9 <sup>2</sup>Australian Registry of Wildlife Health, Taronga Conservation Society Australia, Mosman,  
10 New South Wales, Australia.

11

12

13 \*Correspondence to:

14 Prof. Edward C. Holmes

15 Sydney Institute for Infectious Diseases, School of Medical Sciences,

16 The University of Sydney,

17 NSW, 2006, Australia.

18 Email: [edward.holmes@sydney.edu.au](mailto:edward.holmes@sydney.edu.au)

19

20 Dr. Karrie Rose

21 Australian Registry of Wildlife Health, Taronga Conservation Society Australia,

22 Mosman, New South Wales, Australia.

23 Email: [krrose@zoo.nsw.gov.au](mailto:krrose@zoo.nsw.gov.au)

24 **ABSTRACT**

25 More than 70 bat species are found in mainland Australia, including five species of megabat  
26 from a single genus (family Pteropodidae) and more than 65 species representing six families  
27 of microbats. The conservation status of these animals varies from least concern to  
28 endangered. Research directed at evaluating the impact of microorganisms on bat health has  
29 been generally restricted to surveillance for specific pathogens. While most of the current bat  
30 virome studies focus on sampling apparently healthy individuals, little is known about the  
31 infectome of diseased bats. We performed traditional diagnostic techniques and  
32 metatranscriptomic sequencing on tissue samples from 43 individual bats, comprising three  
33 flying fox and two microbat species experiencing a range of disease syndromes, including  
34 mass mortality, neurological signs, pneumonia and skin lesions. We identified reads from  
35 four pathogenic bacteria and two pathogenic fungi, including *Pseudomonas aeruginosa* in  
36 lung samples from flying foxes with peracute pneumonia, and with dermatitis. Of note, we  
37 identified the recently discovered Hervey pteropid gammaretrovirus, with evidence of  
38 replication consistent with an exogenous virus, in a bat with lymphoid leukemia. In addition,  
39 one novel picornavirus, at least three novel astroviruses and bat pegiviruses were identified.  
40 We suggest that the most likely cause of peracute lung disease was *Pseudomonas aeruginosa*,  
41 while we suspect Hervey pteropid gammaretrovirus was associated with lymphoid leukemia.  
42 It is possible that any of the novel astroviruses could have contributed to the presentation of  
43 skin lesions in individual microbats. This study highlights the importance of studying the role  
44 of microorganisms in bat health and conservation.

45

46 **IMPORTANCE** Bats have been implicated as reservoir hosts for zoonotic disease of  
47 concern, however, the burden of microorganism including viruses on bat health and disease is  
48 understudied. Here we incorporated veterinary diagnostics and RNA sequencing to identify

49 the presence of microbes and viruses with possible pathogenic status in Australian bats with  
50 varying disease presentations. These techniques were able to effectively identify and describe  
51 several pathogenic species of bacteria and fungi in addition to known and novel viruses. This  
52 study emphasises the importance of screening pathogens in cases of bat mortality for the  
53 conservation of this diverse order.

## 54 INTRODUCTION

55 The mammalian order Chiroptera comprises over 1000 species of bat with a near global  
56 distribution. In recent years bats have gained attention for their ability to carry a large number  
57 of viruses, some of which have jumped hosts to emerge in new species (1). As the sampling  
58 of bats has increased dramatically over the last decade so the known bat virosphere has  
59 similarly expanded, including the discovery of numerous novel viruses in addition to new  
60 variants of existing zoonotic pathogens (2-5). Of particular importance is understanding the  
61 factors that enable bats to carry such a high diversity and abundance of viruses, likely  
62 reflecting unique immunological components in conjunction with such factors as large  
63 population densities and high body temperature during flight (6, 7). In turn, such research has  
64 led to a common belief that bats are able to tolerate a multitude of seemingly commensal  
65 viruses and do not experience large-scale outbreaks of infectious disease. Bats, however, are  
66 clearly susceptible to microbial infections with, for example, *Pseudogymnoascus destructans*,  
67 a fungus that causes white-nose syndrome, having a devastating effect on bats in North  
68 America (8, 9). In addition, infection with lyssaviruses can result in neurological and  
69 behavioural changes in bats (10).

70

71 Over 70 species of bat from the families Emballonuridae, Hipposideridae, Pteropodidae,  
72 Megadermatidae, Miniopteridae, Molossidae, Rhinolophidae, Rhinonycteridae and  
73 Vespertilionidae inhabit mainland Australia (11). As of 2021, the International Union for  
74 Conservation of Nature (IUCN) Red List of Threatened Species lists nine of these as  
75 vulnerable, six as near threatened, one as endangered (the spectacled flying fox, *Pteropus*  
76 *conspicillatus*) and two as extinct (11). Together with the endangered spectacled flying fox,  
77 three other *Pteropus* species inhabit Australia: the grey-headed flying fox (*P. poliocephalus*),  
78 listed as vulnerable, while the little red flying fox (*P. scapulatus*) and black flying fox (*P.*

79 *alecto*) are listed as of least concern. The habitat range of these flying fox species includes  
80 the north and east of Australia, with the grey-headed flying fox inhabiting as far west as  
81 Adelaide, South Australia (12). Australia is also home to several insectivorous microbat  
82 species, which, together with flying foxes (frugivores and nectivores), play an essential role  
83 in maintaining Australia's ecosystems by distributing seeds, pollinating plants and controlling  
84 insect numbers (13-15). Consequently, any major decline in bat numbers in Australia could  
85 have a negative impact on ecosystem health (15).

86  
87 While mass mortalities of adult and young flying foxes have been associated with periods of  
88 extreme heat (16, 17), additional disease syndromes and mass mortality events have recently  
89 emerged in Australian chiropterans. Episodic mass pup abandonment has been associated  
90 with extreme heat, but also dehydration, nutritional stress, and dam death or desertion (16).  
91 Herein, we describe the emergence of several novel disease syndromes in flying foxes,  
92 including a distinctive pattern of acute to peracute vascular and inflammatory lung lesions in  
93 grey-headed flying foxes and a black flying fox following exposure to stressors such as  
94 extreme heat, mass pup abandonment, or traumatic injury. Additionally, an emergent  
95 syndrome of neurological disease in flying foxes is characterised by flaccid paralysis, severe  
96 central depression, tongue protrusion, and voice changes. Affected animals test negative for  
97 lyssavirus and often present thin, after periods of heavy rain. A dermatopathy in grey-headed  
98 flying foxes in extended rehabilitation care is characterised by depigmentation, ulceration and  
99 moist dermatitis of the wing webs. Individual cases in our study included wild flying-foxes  
100 with multisystemic lymphoma, and nodular wing web lesions associated with mite  
101 infestation.

102

103 To help identify the aetiological agents behind the presentation of severe disease in several  
104 bat species in Australia, we used traditional veterinary diagnostic techniques and a  
105 metatranscriptomic (i.e., total RNA sequencing) approach to characterise the histological  
106 change and viral and microbial diversity in tissues taken from bats displaying varying signs  
107 of disease, including neurological signs, peracute death and skin lesions (Table S1). The  
108 species of bat included in this study comprise grey-headed, black and little red flying foxes,  
109 as well as two species of microbats – eastern bent-wing bat (*Miniopterus orianae oceanensis*)  
110 and large footed myotis (*Myotis Macropus*) (Table S1).

111

## 112 **RESULTS**

113 **Peracute to acute pneumonia in bats.** Wildlife rehabilitators in the Sydney basin noted the  
114 rapid decline and demise of flying foxes following mild to moderate trauma. Affected  
115 animals refused food then became progressively weak, moribund and died within 12-48  
116 hours. Post-mortem examination of these animals revealed a uniform pattern of voluminous  
117 lungs with multifocal petechial haemorrhages (Fig. 1a). Impression smears of affected lung  
118 tissue often contained fine bacilli, individually, forming palisades, or clustered within the  
119 cytoplasm of macrophages (Fig. 1a inset). Similar gross changes were noted in animals  
120 evaluated following extreme heat related mass mortalities or mass pup abandonment. On  
121 histologic examination of affected animal tissues, the lung lesions consisted of perivascular  
122 haemorrhage with interstitial oedema, fibrin deposition and necrosis (Fig. 1b). Lesions were  
123 often devoid of inflammatory cell infiltration (peracute), while others contained variable  
124 numbers of neutrophils and histiocytes (acute). *Pseudomonas aeruginosa* was isolated in  
125 microbial culture from nine of fifteen grey-headed flying fox lungs, and from a single black  
126 flying fox lung. Isolates were susceptible to a wide range of antimicrobial agents. Correlation  
127 between the identification of fine bacilli in lung impression smears with the isolation of *P.*

128 *aeruginosa* was high. Although *P. aeruginosa* was the only isolate in six bat lung samples,  
129 *Escherichia coli*, *Klebsiella oxytoca*, *Lactococcus lactis*, *Enterobacter asburiae*, and  
130 *Streptococcus* species were also isolated in some lung tissues. *Salmonella enterica* serovar  
131 Wangata was also isolated in the lung and intestine of a young female grey-headed flying fox  
132 that died immediately after being rescued from a pup abandonment event. This animal had  
133 neutrophilic interstitial pneumonia, but also necrotising hepatitis, histiocytic colitis and  
134 evidence of septicaemia.



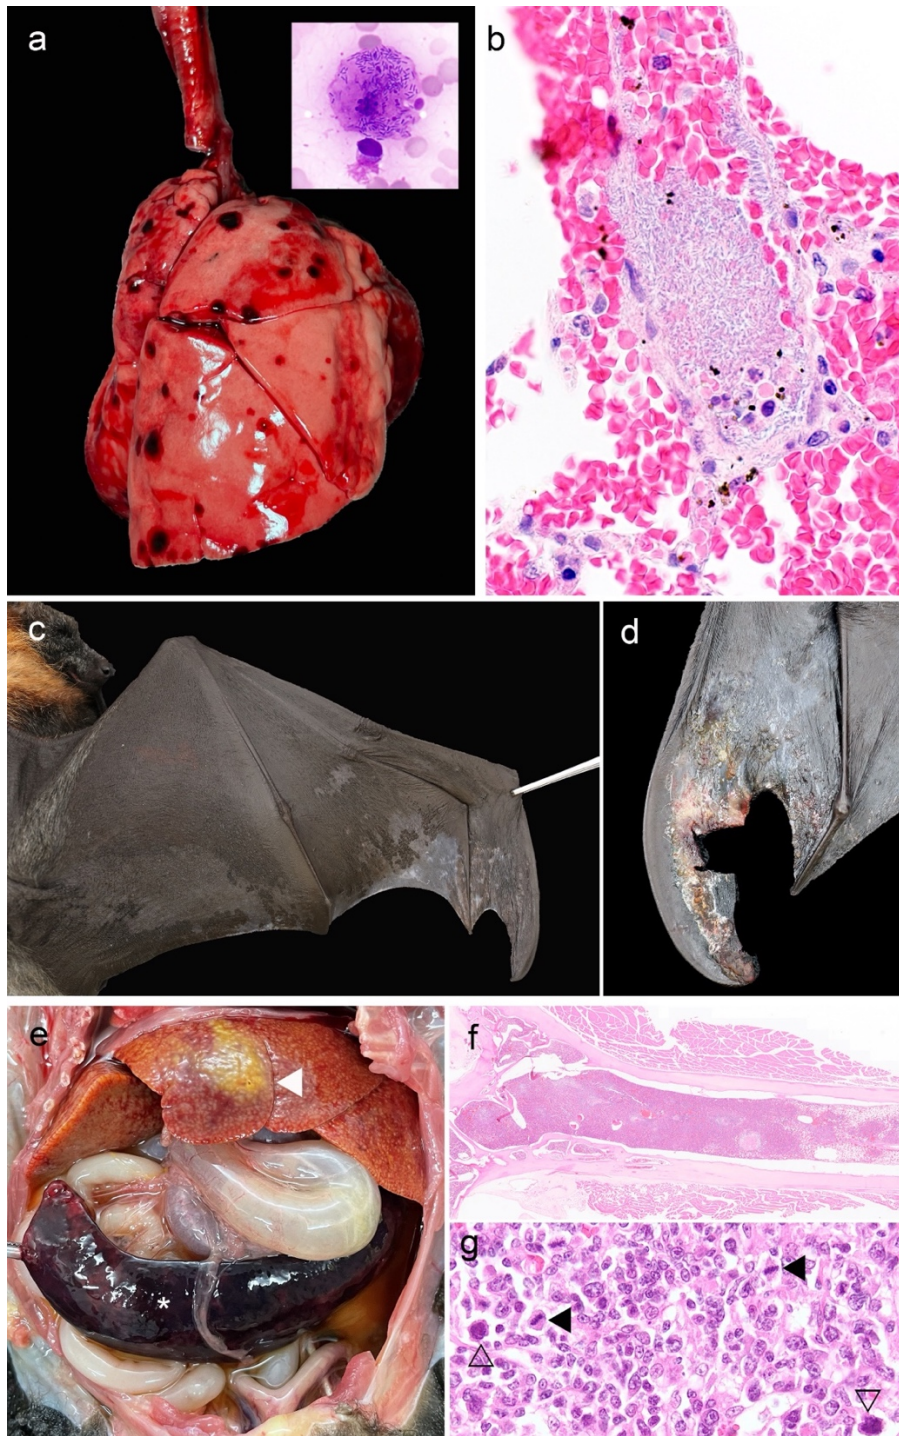

135

136 **FIG 1** (a) Voluminous lungs with multifocal haemorrhages in a grey-headed flying fox.

137 Inset: a pulmonary macrophage contains intracellular fine bacilli (lung impression smear,

138 Quick Dip™ 1000x, case 14053.1). (b) Photomicrograph illustrating acute pulmonary

139 perivascular haemorrhage associated with palisades of fine bacilli transmigration an

140 interstitial blood vessel wall. (c and d) Depigmentation and ulceration (d - with square



141 excisional biopsy defect) extensively across the wing webs of grey-headed flying foxes  
142 (cases 14130.1 and 3). (e) Abdominal cavity of a grey-headed flying fox with abundant  
143 peritoneal fluid, a large liver with miliary, coalescing, raised, pale subcapsular foci  
144 (euthanasia artefact - white arrowhead) and marked splenomegaly (\*). (f and g) Leukemia in  
145 a grey-headed flying fox. (f) The bone marrow is replaced with densely packed neoplastic  
146 cells (HE 20x). (g) Lymph node architecture is effaced by a confluence of medium sized  
147 round cells, some of which have bizarre nuclei (open arrowheads) or mitotic figures (black  
148 arrowheads) (case 14065.1, HE 1000x).

149

150 **Flying fox paralysis syndrome.** An emergent, episodic syndrome of flaccid paralysis and  
151 central nervous system depression is characterised by bats that are recumbent, with  
152 protruding tongues, and unusual vocalisations. Affected bats can sometimes grasp on to wire  
153 or a branch: however, this is a passive action for the chiropteran foot, which can occur in the  
154 face of paralysis. Bats with this syndrome tend to present in clusters, or in large numbers  
155 (>150). Males are over-represented, and their body condition is generally poor, with weight  
156 15-25% less than that expected based on the forearm measurement. Events tend to occur after  
157 periods of heavy rain. No significant histological lesions have been detected in affected  
158 animals, except for a single grey-headed flying fox that had lung lesions, as described above.

159

160 **Ulcerative and depigmenting dermatopathy in bats.** Ecologists and wildlife rehabilitators  
161 often report patches of depigmentation of the flying fox wing web in free-ranging animals.  
162 Flying foxes in rehabilitation care have been observed to develop extensive depigmentation  
163 of the wing web with gross and histological evidence of hyperkeratosis, dermatitis and  
164 ulceration at the tips of the wing webs. Four affected young flying foxes in wildlife  
165 rehabilitation care were euthanised and examined (Fig. 1c and d). *Pseudomonas aeruginosa*

166 was isolated from swabs collected from the active lesions of each animal. Although *P.*  
167 *aeruginosa* was a predominant isolate from each animal, moderate growth of *Serratia*  
168 *marcescens* was also grown in skin swabs from three animals. Variable growth of  
169 *Pseudomonas protegens*, *Enterococcus faecalis*, alpha haemolytic *Streptococcus*, and  
170 *Fusarium* species were also detected.  
171  
172 **Isolated bat cases.** This study also included animals with no distinctive disease pattern. A  
173 single subadult male grey-headed flying fox with mite associated wing web lesions was  
174 euthanised after antiparasitic treatment resulted in central nervous system depression (bat no.  
175 11501.1). A single adult female grey-headed flying fox was euthanised due to recumbency  
176 and marked abdominal distension (bat no. 14065.1). Post-mortem examination revealed  
177 marked peritoneal effusion with clear, straw-coloured fluid, and severe hepatosplenomegaly  
178 (Fig. 1e). The hepatic tissue contained a prominent zonal pallor, which appeared raised along  
179 the capsular surface. On histologic examination, the spleen, lymph nodes, bone marrow,  
180 periportal hepatic parenchyma, and portions of the kidney and adrenal gland were effaced by  
181 sheets of neoplastic cells (Fig. 1f). An impression smear of the spleen, and histological  
182 examination of affected tissues revealed a confluent array of monomorphic medium to large  
183 lymphocytes often exhibiting karyomegaly, reniform or bizarre nuclei, and two to three  
184 mitotic figures per 1000x field (1g), characteristic of lymphoid leukemia.  
185  
186 **Overview of metatranscriptomic data.** In total, 32 tissue libraries were prepared for total  
187 RNA sequencing, comprising 10 from lung tissue, 10 from brain tissue, 10 from liver tissue  
188 and 2 from skin samples (Table S1). Overall, 38 grey-headed flying foxes, one black flying  
189 fox, two little red flying foxes, one eastern bent-wing bat and one large footed myotis from  
190 New South Wales (NSW) and the Australian Capital Territory (ACT) were included in this

191 study (Table S1). Each sequencing library produced 87,000-253,000 reads and 112,000-  
 192 696,000 contigs. Overall, we detected sequencing reads from 60 bacterial and 58 fungal  
 193 families (Fig. S1). Additionally, we identified virus sequences belonging to 15 families,  
 194 including novel viruses from the *Astroviridae* and *Picornaviridae* and known viruses from  
 195 the *Flaviviridae* (pegivirus) and *Retroviridae* (gammaretrovirus).

196

197 **Overview of the bacteria and fungi present in bats.** Although the bats sampled here had a  
 198 diverse microbiome (Fig. S1), we detected high levels of read abundance for five potentially  
 199 pathogenic bacteria and fungi in nine bat libraries: *Enterococcus faecalis*, *Pseudomonas*  
 200 *aeruginosa*, *Salmonella enterica*, *Alternaria alternata* and *Fusarium oxysporum* (Fig. 2).

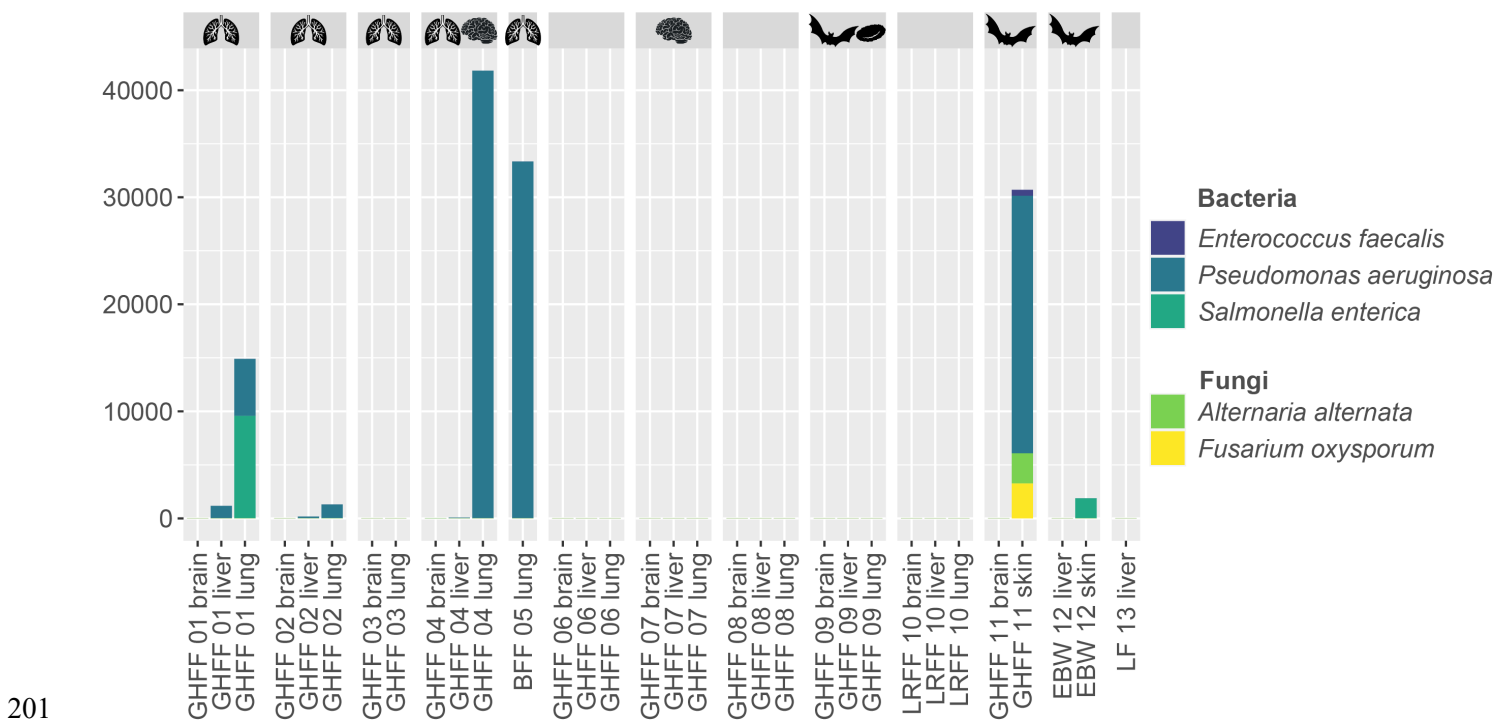

201

202 **FIG 2** Read abundance displayed as reads per million (RPM) for selected bacterial and  
 203 fungal families that were chosen based on pathogenic status. Libraries are separated by bat  
 204 group and the lung, brain, red blood cell and bat silhouettes above the groups indicate which  
 205 libraries were from bats with lung lesions, neurological signs, leukemia and skin lesions,  
 206 respectively. Read abundance was calculated using CCMetagen (18).

207  
208 *P. aeruginosa* (a gram-negative bacterium) had the highest read abundance and was observed  
209 in two liver, one brain, one skin and four lung libraries (Figure 2). The four lung libraries  
210 were from bats experiencing peracute decline or death with evidence of lung lesions,  
211 although we did not detect *P. aeruginosa* in an additional lung library containing bats with  
212 similar presentations and one animal with *P. aeruginosa* isolated in lung tissue (group GHFF  
213 03). Notably, the group GHFF 11 skin library, which had comparable *P. aeruginosa* read  
214 abundance to the lung libraries from bats with pneumonia, was prepared from skin of three  
215 grey-headed flying foxes with noticeable skin lesions (Fig. 2, 1c,d) where *P. aeruginosa* was  
216 isolated in culture. The 16S rRNA genes from *P. aeruginosa* from the four positive lung  
217 libraries displayed nucleotide sequence identities between 92.5 – 99.4%, with the two most  
218 abundant lung libraries, group GHFF 04 and BFF 05, having the most nucleotide sequence  
219 identity between the 16S rRNA genes (99.2%). The low sequence identities between the *P.*  
220 *aeruginosa* 16S rRNA genes of groups GHFF01, GHFF02 and GHFF03 should be  
221 interpreted with caution as these libraries also had low read coverage, with some sections of  
222 the 16S rRNA gene having a coverage of only two reads. Additionally, the *P. aeruginosa* 16S  
223 rRNA gene from the skin of group GHFF 11 displayed 97.2% sequence identity to the 16S  
224 rRNA sequences from group GHFF 04 and BFF 05. *S. enterica* (gram-negative bacterium)  
225 reads were detected in one lung library (group GHFF 01) also containing *P. aeruginosa*, and  
226 a skin library from an eastern bent-wing bat (group EBW 12) (Fig. 2). Finally, *E. faecalis* (a  
227 gram-positive bacterium), *A. alternata* (fungus) and *F. oxysporum* (fungus) were all observed  
228 at lower abundance than *P. aeruginosa* in the group GHFF 11 skin library with skin lesions  
229 mentioned above (Fig. 2).

230

231 **Overview of the viruses present in bats.** Virus contigs matching to 14 families were  
232 identified here. Virus contigs belonging to the *Bornaviridae*, *Adintoviridae*, *Herpesviridae*  
233 *and Phycodnaviridae* were determined as likely to be endogenous virus elements as they  
234 contained no viral conserved domains and/or expected ORFs were interrupted by stop  
235 codons. These viral groups were therefore excluded from all analysis. Similarly, those contigs  
236 classified in the *Partitiviridae*, *Tombusviridae*, *Botourmiaviridae* and *Mitoviridae* were not  
237 analysed further as their closest relatives were viruses of plants, fungi and algae suggesting  
238 that they are dietary or environmental contaminants. Additionally, a *Picobirnaviridae* contig  
239 was disregarded as these viruses likely represent bacteriophage (19). One *Parvoviridae*  
240 contig, with the closest BLASTX hit to viruses of the *Dependoparvovirus* genus, was  
241 detected in group LF 13 liver at low abundance (Fig. 3), although the sequence was too short  
242 (360 bp/ 85 amino acid residues) to perform robust phylogenetic analysis. In contrast, the  
243 *Astroviridae*, *Flaviviridae*, *Picornaviridae* and *Retroviridae* contigs determined here were  
244 considered to be *bona fide* exogenous viruses of vertebrates and therefore investigated further  
245 (Fig. 3).  
246

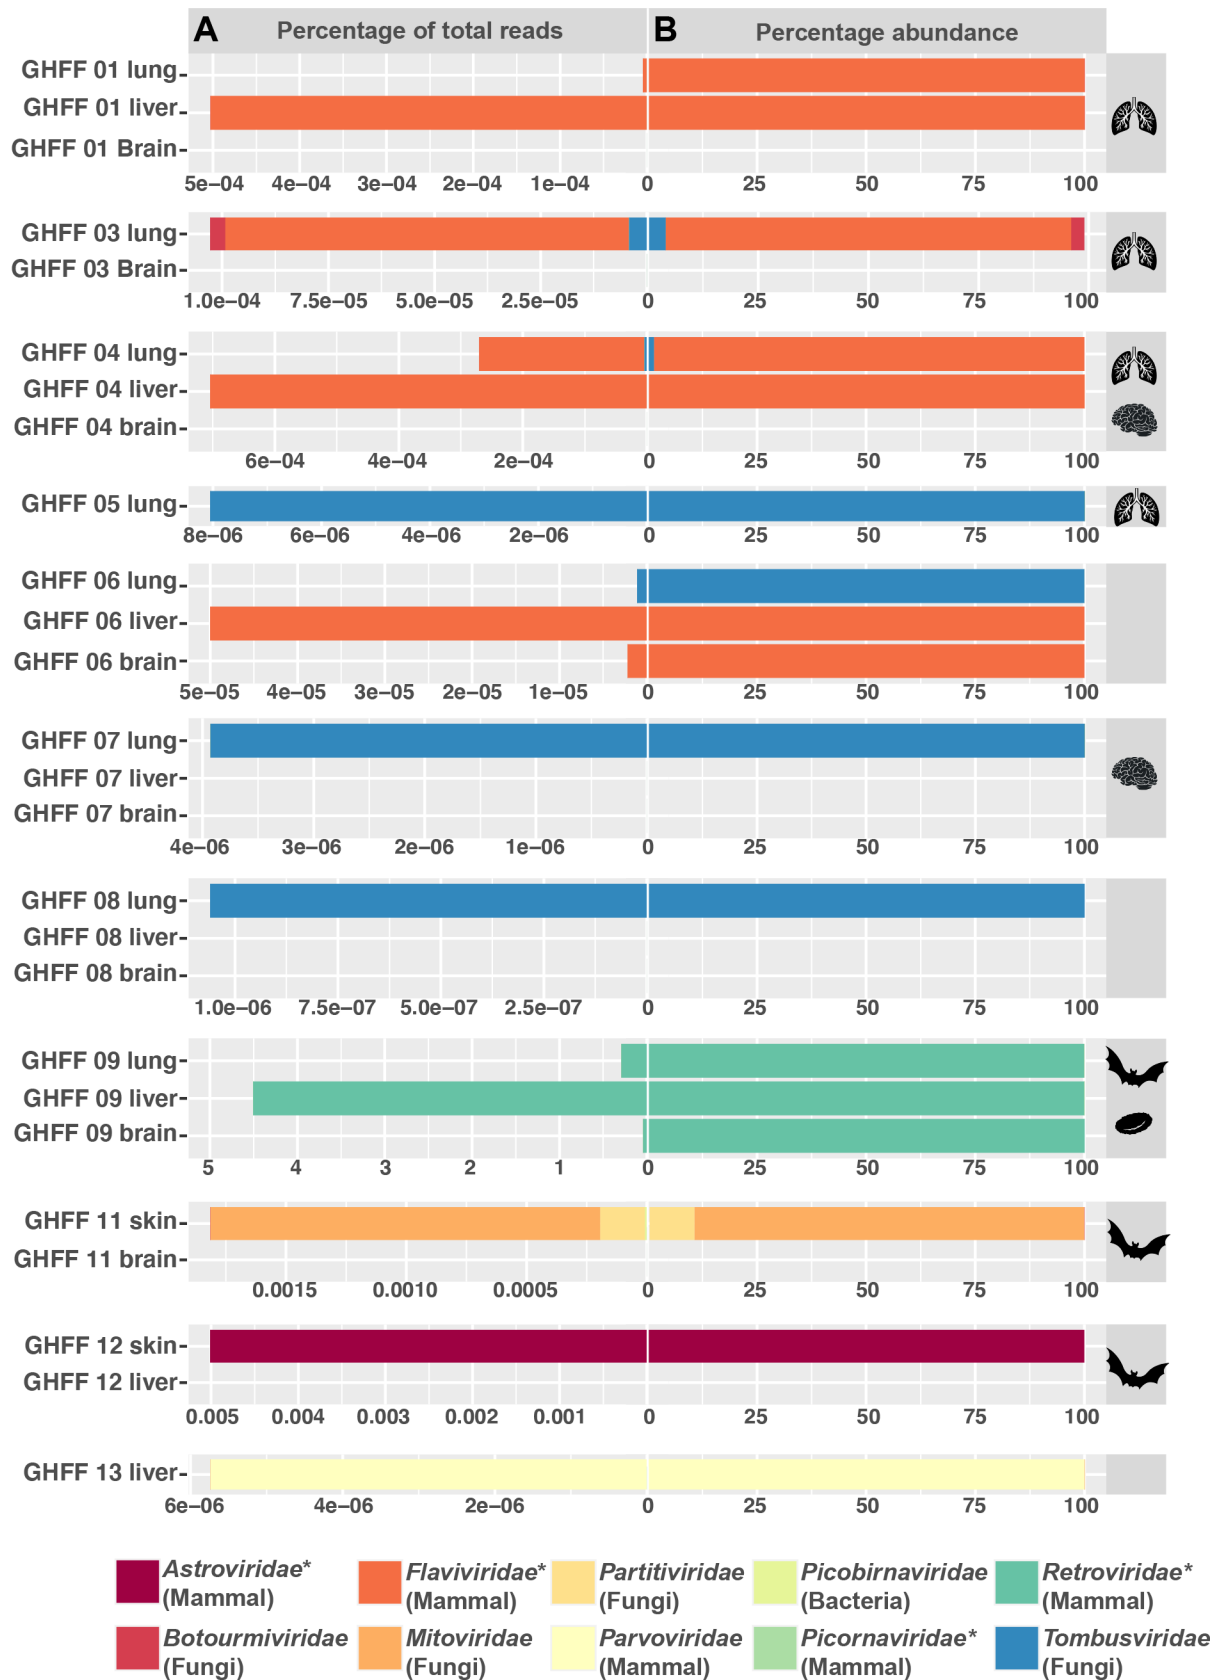

247

248

249

**FIG 3** Read abundance of each viral family (excluding viruses determined to be endogenous), presented as (A) the expected count over the total number of trimmed sequence

250 reads for that library multiplied by 100 and (B) the expected count as a percentage of total  
251 viral reads for that library. Virus families that are discussed further in this study are  
252 highlighted with an asterisk, with the most likely host based on BLASTX for each family  
253 shown in parenthesis. Groups with no virus abundance value are not shown. The lung, brain,  
254 red blood cell and bat silhouettes above the graphs denote which bat groups had bats with  
255 lung lesions, neurological signs, leukemia and skin lesions, respectively.

256

257 **Identification of Hervey pteropid gammaretrovirus.** A partial retrovirus contig of 8,105  
258 bp was identified in the lung library from group GHFF 09. Sequence comparison over the  
259 entire contig revealed a high nucleotide identity (98%) to Hervey pteropid gammaretrovirus  
260 (GenBank accession MN413610.1) previously sampled from the faeces of a black flying fox  
261 from Queensland, Australia (20). Amino acid sequence identities of the contig discovered  
262 here to the gag, pro-pol and env proteins were 100%, 99.2% and 99%, respectively. Such  
263 high sequence identities indicate that this represents a variant of Hervey pteropid  
264 gammaretrovirus. Complete ORFs were observed for the pro-pol and env genes, although  
265 only a partial gag protein missing 22 bp from the 5' end was recovered (Fig. 4A). The read  
266 abundance for Hervey pteropid gammaretrovirus was disproportionately high compared to  
267 the other viruses detected here (Fig. 3). The liver library contained the highest read  
268 abundance (104,147 FPKM), slightly lower than observed for the host COX1 housekeeping  
269 gene (130,674 FPKM). The read abundance for the lung and brain libraries were 51,897 and  
270 4,243 FPKM, respectively. Notably, phylogenetic analysis showed the gammaretroviruses  
271 sampled from Australian bats form a clade in the full genome phylogeny, indicative of  
272 ongoing evolution within Australia (Fig. 4B).



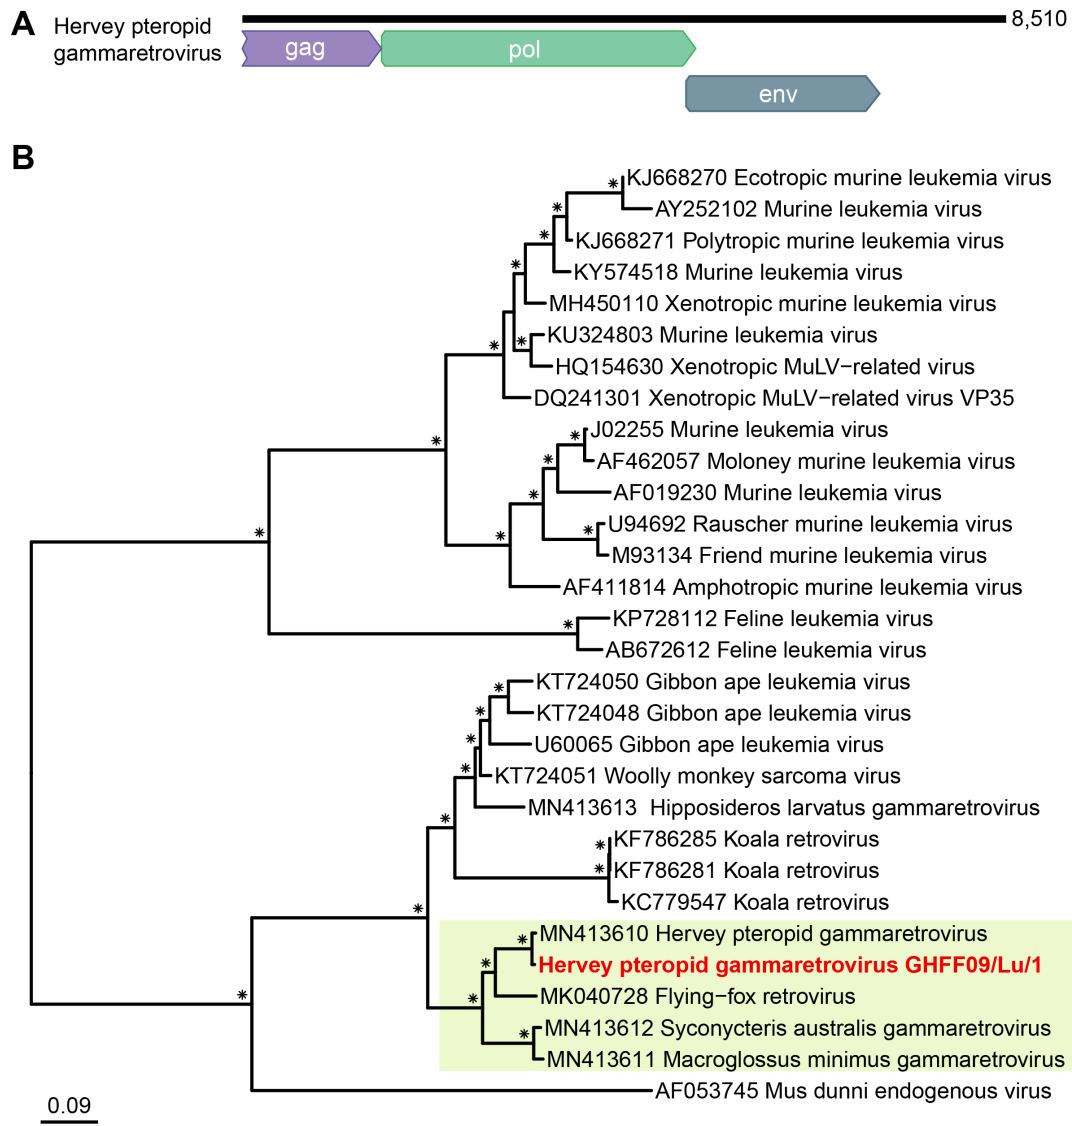

274 **FIG 4** (A) Genome organisation of the Hervey pteropid gammaretrovirus variant detected in  
 275 this study. (B) Phylogenetic relationships of the gammaretrovirus genus determined using the  
 276 full genome nucleotide sequence. The bat gammaretrovirus from this study is coloured in red  
 277 and the gammaretroviruses from Australian bats are highlighted with a yellow background.  
 278 Bootstrap values >70% are represented by the \* symbol shown at the branch node and the  
 279 tree is rooted at midpoint for clarity. The scale bar represents the number of nucleotide  
 280 substitutions per site.

281

282 We next performed PCR targeting the gag, pol and env genes (Table S2) on the individual  
 283 lung, brain and liver RNA from the four bats included in group GHFF 09. This revealed that

284 Hervey pteropid gammaretrovirus was present in two grey-headed flying foxes. A positive  
285 PCR result was observed in the lung, brain and liver samples from a female grey-headed  
286 flying fox found in Sydney, NSW (bat no. 14065.1; Table S1). This bat was euthanised due  
287 to ill-thrift and abdominal distension and histological changes were consistent with lymphoid  
288 leukemia. An additional positive PCR result was seen for a liver sample from a male grey-  
289 headed flying fox with white skin lesions from Woolgoolga, NSW (bat no. 11501.1; Table  
290 S1). No RNA from other tissue types was available for PCR for this animal.

291

292 **Novel bat astroviruses.** We identified a high abundance of astroviruses in a skin library  
293 (group EBW 12) from a single male eastern bent-wing bat with noticeable white skin lesions  
294 and underlying joint damage associated with severe mite infestation (bat no. 13087.1; Table  
295 S1). The eastern bent-wing bat was located in Yass, NSW, a town approximately 300 km  
296 from Sydney. Astroviruses possess a positive-sense single strand (+ss) RNA genome and  
297 those associated with mammals are classified in the genus *Mamastrovirus* and have been  
298 linked to gastroenteritis or neurological issues in some species (21).

299

300 Near complete genomes were assembled for three distinct astroviruses, and partial genomes  
301 (with at least partial capsid or RdRp) were assembled for a further five distinct astroviruses,  
302 with contigs lengths ranging from 6,765 bp to 1443 bp (Fig. 5A). Comparative analysis of the  
303 complete capsid protein from the three bat astroviruses with near complete genomes –  
304 provisionally denoted bat astrovirus 2 (6,765 bp; 3,377 reads), bat astrovirus 3 (6,748 bp;  
305 3,217 reads) and bat astrovirus 4 (6,747 bp; 2,067 reads) – showed their amino acid identities  
306 to each other to be 57-67%, and only 20-55% to other characterised bat astroviruses. Hence,  
307 each likely represents a novel virus species based on the current species demarcation in  
308 ICTV.

309

310 Phylogenetic analysis of the RdRp and capsid proteins of the bat astrovirus contigs detected  
311 here combined with global sequences revealed a clear clustering of astroviruses collected  
312 from bats and hence a long-term virus-host association (Fig. 5B). The three new species  
313 proposed - bat astrovirus 2, bat astrovirus 3 and bat astrovirus 4 - broadly group together in  
314 both the capsid protein and the RdRp phylogenies; although bat astrovirus 3 does not directly  
315 cluster with the other two Australian viruses in the RdRp tree due to the inclusion of  
316 additional bat astrovirus 1 sequences not present in the capsid tree. Additionally, the partial  
317 genome bat astrovirus sequences detected did not group with bat astrovirus 2, 3 and 4,  
318 suggesting that multiple lineages of bat astroviruses are evolving in Australia (Fig. 5B).

319

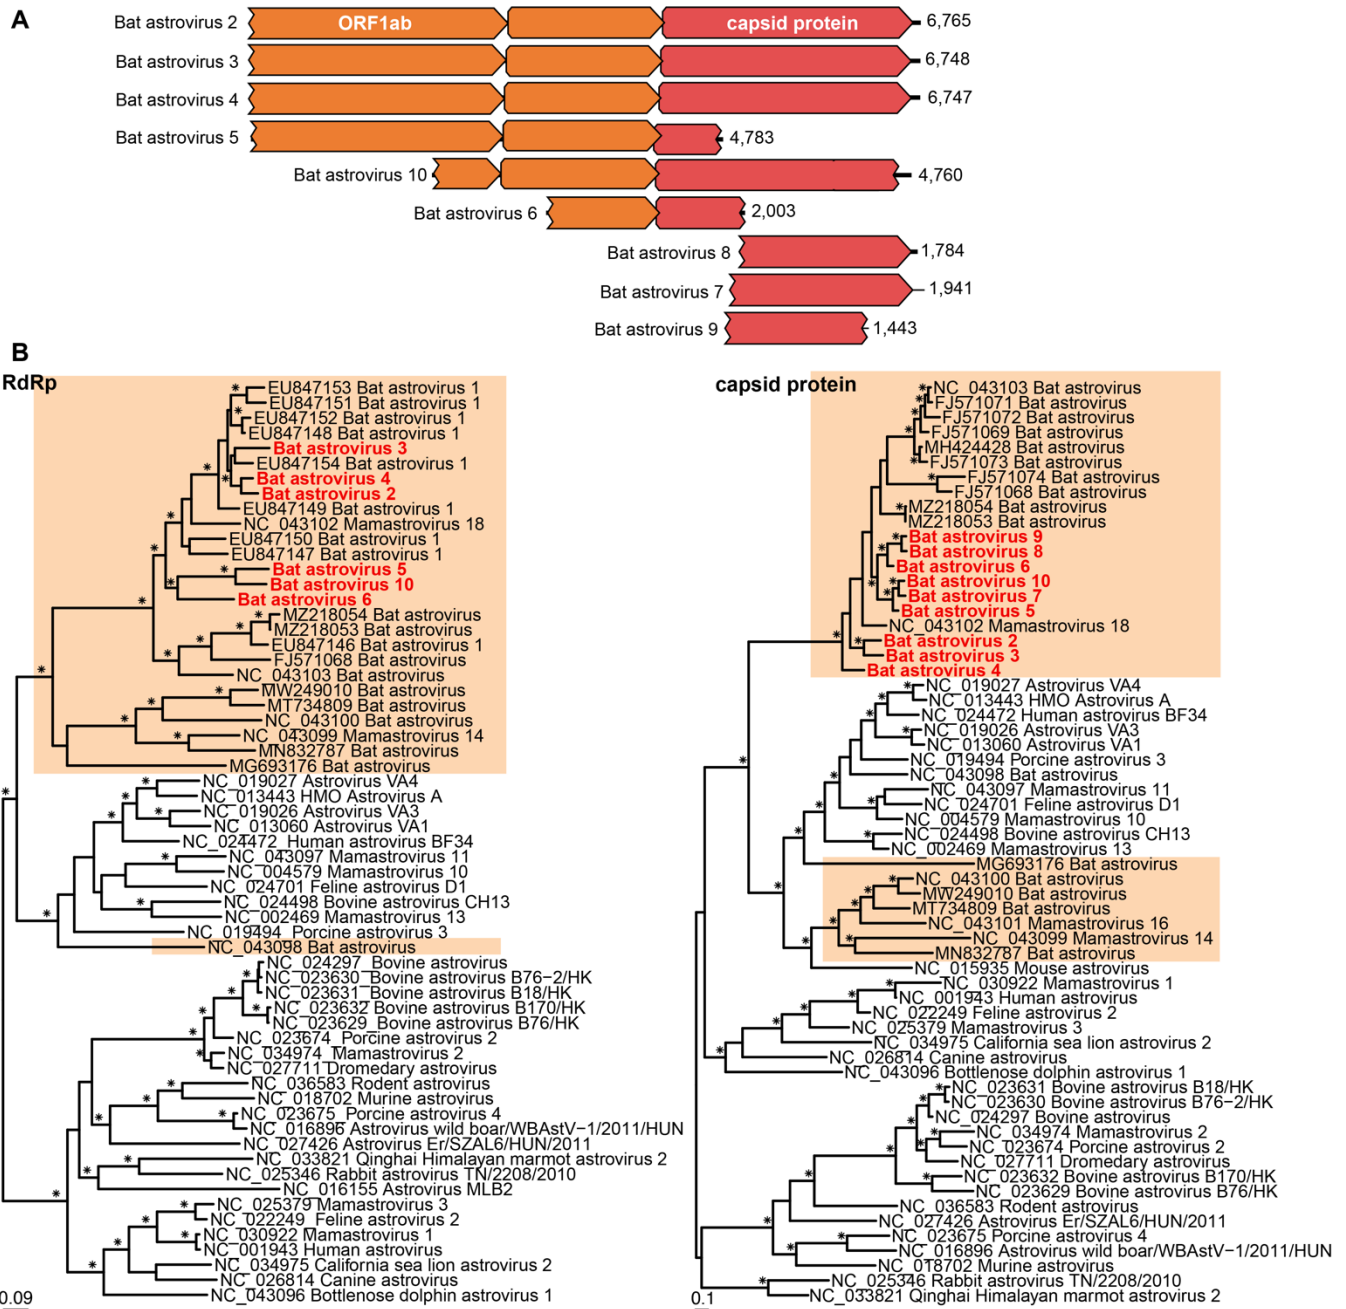

**FIG 5 (A)** Genomic organisation of the bat astroviruses identified in this study. **(B)**

Phylogenetic relationships of mamastroviruses using the RdRp and capsid protein amino acid sequence. Amino acid alignment lengths were 446 and 465 residues for the RdRp and capsid protein, respectively. Bat astroviruses are highlighted in orange and bat astroviruses from this study are coloured in red. Bootstrap values >70% are represented by the \* symbol shown at the branch node. The trees are rooted at midpoint for clarity and the scale bar represents the amino acid substitutions per site.

328  
329  
330  
331  
332  
333  
334  
335  
336  
337  
338  
339  
340  
341  
342  
343  
344  
345  
346  
347  
348  
349  
350  
351

**Bat pegiviruses.** Pegivirus fragments were identified in four bat libraries (group GHFF 01, GHFF 03, GHFF 04 and GHFF 06) containing three, four, five and three bats, respectively (Table S1). Pegiviruses are +ssRNA viruses of the genus *Pegivirus*, family *Flaviviridae*, that are often non-pathogenic in mammalian hosts. In one liver library (group GHFF 04) a complete pegivirus genome (denoted bat pegivirus GHFF04/Li/1) of length 9,784 bp was identified with a read abundance of 1,030, and containing the expected E1, E2, NS2, NS3, NS4A, NS4B, NS5A and NS5B proteins (Fig. 6A). Bat pegivirus GHFF04/Li/1 contigs were also identified in the accompanying lung library from group GHFF 04, with a read abundance of 354. Using primers targeting the NS3 and NS5b region of bat pegivirus GHFF04/Li/1 (Table S2), PCR was performed on the five bats in group GHFF 04. This showed that bat pegivirus GHFF04/Li/1 was present in the lung and liver samples from an adult male grey-headed flying fox from Sydney (bat no. 14121.1; Table S1) that presented with flaccid paralysis and central nervous system depression, including lack of response to stimuli. Necropsy and histopathology revealed necrotising and pyogranulomatous hepatitis, and histiocytic myocarditis. An additional eight unique bat pegivirus contigs (read abundance 221) were identified in liver library GHFF 04, with one contig containing a partial NS3 (GHFF04/Li/2) and another with a partial NS5B (GHFF04/Li/3) region (Fig. 6A). Short pegivirus contigs distinct to the pegiviruses found in GHFF04 were assembled from the liver library from group GHFF 01 (838 reads), the liver library from group GHFF 06 (17 reads), and the lung library from group GHFF 03 (40 reads). As we were unable to extract sufficient RNA from the liver tissue of group GHFF 03, we cannot confirm whether pegivirus contigs were also present in the livers of these bats.

352 Phylogenetic analysis was conducted on translated contigs of sufficient length (>220  
 353 residues) encoding NS3 and NS5b (Fig. 6A). This demonstrated that at least four distinct  
 354 pegiviruses were present in the sampled bats. The bat pegivirus contigs identified here  
 355 formed a clade with bat pegiviruses previously identified from species *Pegivirus B*,  
 356 suggesting that this species has a long association with bats (Fig. 6C).

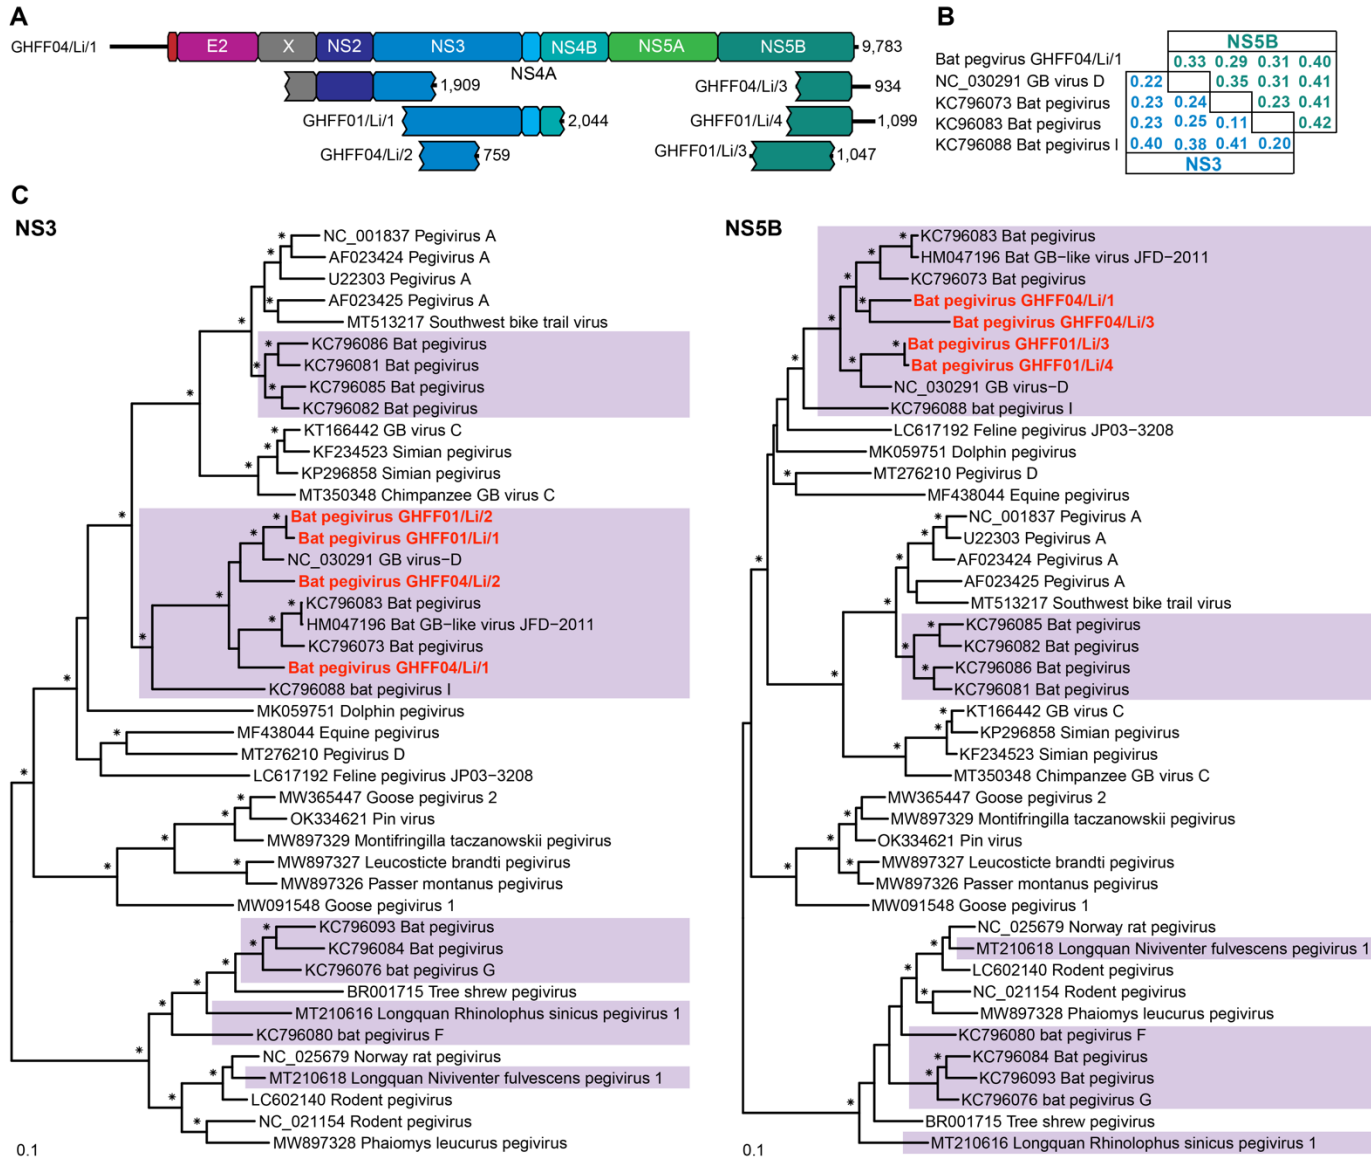

357 0.1

358 **FIG 6** (A) Genomic organisation of the bat pegiviruses identified in this study. (B)  
 359 Uncorrected (p) distances of the amino acid sequences the NS3 and NS5 proteins of selected  
 360 bat pegivirus and GHFF04/Li/1. (C) Phylogenetic relationships within the genus *Pegivirus*  
 361 using the NS3 and NS5B amino acid sequence. Amino acid alignment lengths were 620



362 residues for the NS3 gene and 531 residues for the NS5B gene. Bat pegiviruses are  
363 highlighted in purple and the bat pegiviruses from this study are coloured in red. Bootstrap  
364 values >70% are represented by the \* symbol shown at the branch node. The tree was  
365 midpoint rooted for clarity and the scale bar represents the amino acid substitutions per site.  
366  
367 **Novel bat kunsagivirus.** A novel kunsagivirus (tentatively named Auskunsag virus for the  
368 country in which the bat was sampled, Australia) was identified in a single lung and liver  
369 library containing three grey-headed flying fox individuals from group GHFF 09.  
370 *Kunsagivirus* is a genus of the *Picornaviridae* that have +ssRNA genomes between of 6,800  
371 bp – 7,400 bp in length. The 7,482 bp Auskunsag virus genome comprises the P1 region  
372 containing VP0, VP1 and VP3, the P2 region containing the 2A1, 2A2, 2B and 2C and the P3  
373 region containing the 3A, 3B, 3C and 3D (Fig. 7A).  
374  
375 PCR targeting the 3D region (Table S2) was performed on the four individual bats from  
376 group GHFF 09, confirming that Auskunsag virus was present the lung and liver sampled  
377 from a female juvenile grey-headed flying fox from Sydney with no disease presentation (bat  
378 no. 11553.1; Table S1). The read abundance values for the lung and liver libraries were 6,498  
379 and 359, respectively. The closest related virus based on phylogenetic analysis of the P1 and  
380 3CD regions was Kunsagivirus B1 (accession no. KX644936, Fig. 7C) sampled from the  
381 faeces of a straw-coloured fruit bat (*Eidolon helvum*) in Cameroon (22). Amino acid  
382 identities between Auskunsag virus and Kunsagivirus B1 over the polyprotein, P1 region and  
383 3CD were 68%, 69% and 71%, respectively. The uncorrected (p) distances for the P1 and  
384 3CD region was calculated to determine whether Auskunsag virus should constitute a new  
385 species in the *Kunsagivirus* genus. As Auskunsag virus exhibits nucleotide p-distances that



386 fall below the ICTV classification, set at <0.51 for P1 and <0.52 for 3CD, we propose that  
 387 Auskunsag virus should tentatively represent a new kunsagivirus species (Fig. 7B).

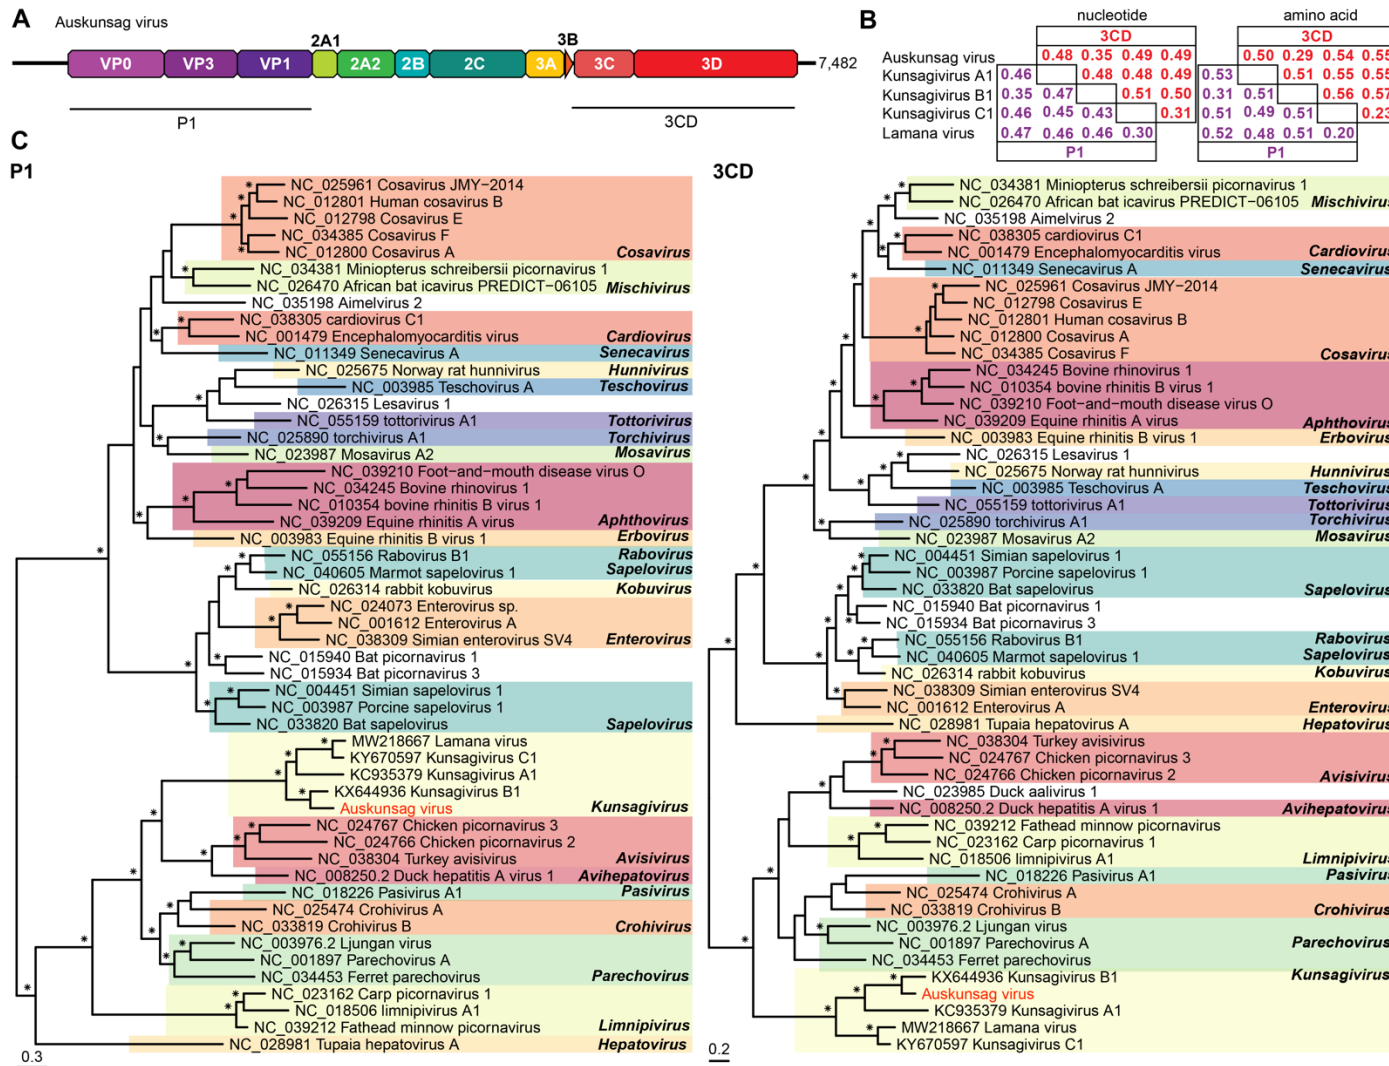

388  
 389 **FIG 7** (A) Genomic organisation of the novel kunsagivirus identified in this study. (B)  
 390 Uncorrected (p) distances among amino acid sequences of the P1 and 3CD regions of the four  
 391 members of the *Kunsagivirus* genus and Auskunsag virus. (C) Phylogenetic relationships of  
 392 Auskunsag virus using amino acid sequences of the P1 and 3CD genes. Amino acid  
 393 alignment lengths were 737 and 653 residues for the P1 and 3CD genes, respectively.  
 394 Auskunsag virus is coloured in red and the different *Picornaviridae* genera are highlighted in  
 395 the tree. Bootstrap values >70% are represented by \* symbols shown at the branch node. The

396 trees were midpoint rooted for clarity and the scale bar represents the amino acid  
397 substitutions per site.

398

## 399 **DISCUSSION**

400 In Australia, numerous native bat species, including the grey-headed flying fox, have  
401 experienced population declines that have resulted in their listing as vulnerable or endangered  
402 species. Population declines are mainly driven by the effects of climate change and  
403 urbanisation, ongoing threats that are likely to continue impacting wild populations (17). Any  
404 additional threat to Australian flying foxes, such as infectious disease, could lead population  
405 numbers to unrecoverable levels. Given the increasing interest in bat health and the role that  
406 bats may play as reservoirs of zoonotic microbes and viruses, we performed  
407 metatranscriptomic sequencing on tissue samples from several Australian bats with  
408 underlying health issues. From this, we were able to identify several pathogenic bacteria and  
409 fungi, an important possibly pathogenic gammaretrovirus, and RNA viruses from the  
410 vertebrate-infecting families *Astroviridae*, *Flaviviridae* and *Picornaviridae*.

411

412 A notable aspect of this study was the metatranscriptomic identification of viruses from tissue  
413 samples in bats with varied disease syndromes, rather than exploring the healthy state virome.  
414 Generally, collecting faeces is the preferred method of sampling bats as it enables large-scale  
415 sample collection in a non-invasive manner. Although characterising the faecal virome of  
416 bats is important for identifying novel and potentially zoonotic viruses, especially from urban  
417 bat populations, the identification of dietary invertebrate and plant viruses is common, such  
418 that viromes may differ between faecal and tissue samples (23-25). Our previous study of the  
419 faecal virome of the grey-headed flying fox identified bat viruses belonging to the  
420 *Coronaviridae* and *Caliciviridae*, as well as a myriad of insect and plant viruses likely

421 associated with the diet (26). Notably, no mammalian viruses belonging to the *Flaviviridae*,  
422 as well as only one short contig matching to *Astroviridae* and two short contigs matching to  
423 *Picornaviridae*, were identified in marked contrast to the results presented here (26).  
424  
425 Analysis of the microbiome from Australian bat tissues identified four bacterial and two  
426 fungal species of pathogenic concern. *Salmonella enterica* serovar Wangata was isolated in  
427 culture from the lung and intestine of a young grey-headed flying fox found with histological  
428 evidence of colitis, hepatitis and interstitial pneumonia in a pattern consistent with  
429 septicaemia (bat no. 13402.1). This organism is an important cause of human salmonellosis  
430 in NSW (27). *P. aeruginosa* is an opportunistic pathogen that can cause pneumonia in  
431 immunocompromised people (28, 29), which was identified by culture and  
432 metatranscriptomic investigation within lung tissue of ten diseased bats in this study.  
433 Affected bats had a consistent pattern of fibrin necrotising, neutrophilic or histiocytic  
434 interstitial pneumonia. In two lung libraries, both from flying foxes, *P. aeruginosa* reads were  
435 at high abundance (Fig. 2). It is unclear whether the presence of *P. aeruginosa* in these bats is  
436 a primary cause of lung disease. All affected animals had a history of trauma, heat stress or  
437 involvement in a mass mortality event, suggesting that *P. aeruginosa* is acting as a  
438 secondary, opportunistic infection. Furthermore, analysis of the *P. aeruginosa* 16S rRNA  
439 gene showed sequence diversity, suggesting that the presentation of peracute pneumonia in  
440 the bats is unlikely to be caused by the clonal expansion of a single pathogenic *P. aeruginosa*  
441 organism. The abundance of *P. aeruginosa* was also high in a single skin library (Fig. 2).  
442 This library contained ulcerated and hyperkeratotic skin samples from three grey-headed  
443 flying foxes where *P. aeruginosa*, *Serratia marcescens*, and other bacteria were isolated in  
444 culture. It is important to note that *P. aeruginosa* is found in the environment and can be  
445 found as part of the skin microbiome (28, 30). When *P. aeruginosa* is present on the skin it

446 can opportunistically cause skin and soft tissue infections in humans (30). The high read  
447 abundance of *P. aeruginosa* in the skin library of grey-headed flying foxes with noticeable  
448 wing skin lesions is interesting, although it may constitute a harmless part of the skin  
449 microbiome at the time of sampling.

450

451 In some instances, bacteria were isolated in tissue culture of bat lesions, but were not  
452 abundant within the metatranscriptomic data, most likely reflecting overgrowth of highly  
453 cultivable organisms rather than true organism diversity and abundance. Alternatively,  
454 pooling samples for metatranscriptomic investigations may diminish the relative abundance  
455 of some organisms. The integration of traditional and metatranscriptomic diagnostic pipelines  
456 has the potential to more fully explore the microbial diversity of wildlife while tempering the  
457 potential biases inherent in each approach.

458

459 A notable finding was the detection of Hervey pteropid gammaretrovirus in a group of grey-  
460 headed flying foxes (group GHFF 09). This virus was previously described from the faeces of  
461 a black flying fox from Queensland, Australia, and shown to be a functional exogenous virus  
462 (20). Investigation herein using PCR revealed that Hervey pteropid gammaretrovirus was  
463 present in two grey-headed flying foxes from the same pool of bats. Notably, an adult female  
464 grey-headed flying fox with lymphoid leukemia in which virus was detected by PCR in lung,  
465 brain and liver samples. The second animal was a male with white skin lesions and detectable  
466 virus in the liver. RNA from other tissues was not available for this animal for PCR testing.  
467 These grey-headed flying foxes were from Sydney and Woolgoolga, NSW, with Sydney  
468 being the furthest south this virus has been detected (20). Hervey pteropid gammaretrovirus  
469 is phylogenetically related to koala retrovirus and gibbon ape leukemia virus (20), both of  
470 which are associated with immune deficiencies and leukemia (31, 32). The presence of

471 Hervey pteropid gammaretrovirus in a bat with lymphoid leukemia suggests a possible  
472 association with disease, although further research is needed to reveal any mechanistic role  
473 the virus plays in disease manifestation. Replication competent Hervey pteropid  
474 gammaretrovirus virions have been tested *in vitro* and confirmed to infect bat and human cell  
475 lines, although virions were synthetically constructed using the consensus sequence from  
476 RNA sequencing (20). Isolating infectious virus from the bat with lymphoid leukemia,  
477 combined with additional *in vitro* studies, may provide better insight into transmissibility and  
478 the pathogenic potential of the virus. The FPKM counts in the liver library from group GHFF  
479 09 (104,147) were comparable to those for the bat COX1 housekeeping gene (130,674). Such  
480 a high abundance is compatible with active virus replication at the time of sampling, although  
481 the contribution of each individual bat liver sample toward the total liver library  
482 gammaretrovirus abundance cannot be determined.

483

484 In the same group of bats (GHFF 09) in which we identified Hervey pteropid  
485 gammaretrovirus we detected a novel picornavirus belonging to the genus *Kunsagivirus*. This  
486 genus currently contains three recognised species sampled from the faeces of a European  
487 roller in 2011 (33) and a straw-coloured fruit bat in Cameroon (22), respectively, and from  
488 the blood of a yellow baboon in Tanzania (34). A fourth kunsagivirus sequence was more  
489 recently sampled from vervet monkeys from Uganda (35). Here, we characterised a novel  
490 kunsagivirus, tentatively named Auskunsag virus, in a liver sample from a female juvenile  
491 grey-headed flying fox from Sydney, Australia, and absent from the two bats in which  
492 Hervey pteropid gammaretrovirus was detected. Auskunsag virus is the first report of a  
493 kunsagivirus in the Asia-pacific region and of a kunsagivirus in tissue samples, indicating  
494 that this genus is most likely mammalian-infecting and not dietary or invertebrate-associated.

495 Viruses of the genus *Kunsagivirus* currently have no disease association, although additional  
496 research is needed for confirmation.

497

498 Multiple astroviruses were detected in a single skin library containing one eastern-bent wing  
499 bat that had noticeable skin lesions coupled with underlying joint damage. A total of 74% of  
500 the characterised bat astroviruses on NCBI GenBank were sampled exclusively from faeces.

501 As it currently stands, no bat astroviruses have been sampled from skin, although Avian  
502 nephritis virus 3 of the genus *Avastrovirus* has been detected in the joint and tendons sampled  
503 from boiler chickens and poult turkeys with arthritis and tenosynovitis and was proposed to  
504 have a possible association with these conditions (36). The diversity of astroviruses in  
505 Australian bats has yet to be assessed, and only one sequence of the *Astroviridae* from an  
506 Australian bat is available on GenBank. This sequence, microbat bastrovirus (accession no.  
507 MT766313), is more closely related to the diverse group of astroviruses termed bastroviruses  
508 that contain a hepe-like non-structural protein and an astro-like structural protein (37). A  
509 study of Asian and European bat species showed that astroviruses are common in bat  
510 populations and in some incidences were at high prevalence (38-42). The detection of several  
511 diverse bat astroviruses in this study suggests that numerous astroviruses may be circulating  
512 within the bat population in Australia and that further research is needed to fully understand  
513 their community structure and potential contribution to disease.

514

515 Finally, we detected bat pegivirus contigs in four grey-headed flying fox groups (GHFF 01,  
516 GHFF 03, GHFF 04 and GHFF 06), with one containing a complete genome – bat pegivirus  
517 GHFF04/Li/1. Generally, pegiviruses are non-pathogenic and associated with persistent  
518 infections in mammals, although members of the species Pegivirus D have been associated  
519 with the development of Theiler's disease in infected horses (43). Although we detected bat

520 pegivirus GHFF04/Li/1 in a grey-headed flying fox with necrotising and granulomatous  
521 hepatitis and histiocytic myocarditis, we also detected bat pegiviruses in bats with no clear  
522 liver or heart disease suggesting that it is likely a commensal pathogen like most other  
523 pegiviruses.

524

525 The sustainability of micro and megabat species globally is important for the sustainability of  
526 the world's ecosystems. In countries with continual threats, such as habitat change and  
527 destruction, land use change, agricultural practices adverse to bat health, extreme  
528 temperatures and white-nose syndrome, efforts to maintain population numbers are critical.  
529 Ongoing monitoring of bat health and disease and using traditional and metatranscriptomic  
530 diagnostic techniques is warranted to explore the diversity of microbes with pathogenic  
531 potential that might be expressed in the form of disease in populations subject to landscape-  
532 wide change. The presence of a retrovirus from a genus with members that are associated  
533 with immune deficiencies and leukemia, in a bat with lymphoid leukemia, undoubtedly  
534 merits further investigation and broader surveillance.

535

## 536 **METHODS**

537 **Animal Ethics and sample collection.** Wild bats were examined under a License to  
538 Rehabilitate Injured, Sick or Orphaned Protected Wildlife (no. MWL000100542) issued by  
539 the NSW Department of the Environment All samples were collected post-mortem from bats  
540 that were submitted for disease investigation. These samples were collected under the  
541 auspices of the Taronga Conservation Society Australia's Animal Ethics Committee  
542 (approval no. 3b1218), pursuant to NSW Office of Environment and Heritage-issued  
543 scientific license no. SL10469 and SL100104.

544



545 Samples from 38 grey-headed flying foxes, one black flying fox, one large footed myotis, one  
546 eastern bent-wing bat and two little red flying foxes were collected between November 2013  
547 and April 2021 (Table S1). Most animals emanated from the Sydney basin and the central  
548 coast region of New South Wales. Fresh portions of brain, lung, liver, skin, heart, kidney and  
549 any lesions were collected aseptically post-mortem and frozen at  $-80^{\circ}\text{C}$ . Impression smears  
550 of cut sections of lung tissue, or other lesions, were prepared from a subset of animals. The  
551 tissue was blotted onto a glass slide, air dried, fixed and stained with Quick Dip (Fronine,  
552 Thermo Fisher Scientific Aust. Pty. Ltd., Scoresby, Victoria, Australia) and examined at  
553 1000x magnification with oil emersion microscopy. A range of tissues from each animal was  
554 fixed in 10% neutral buffered formalin, processed in ethanol, embedded with paraffin,  
555 sectioned, stained with hematoxylin and eosin, and mounted with a cover slip for  
556 examination by light microscopy.

557

558 **Microbial culture.** Microbial culture was conducted using a subset of bat tissues where there  
559 were gross or histological lesions, including 16 lung samples, and four skin samples. Culture  
560 was also conducted on four food sources used in bat rehabilitation care. Lung and lesion  
561 impression smears were stained with Gram and ZN were examined under 1000x oil  
562 immersion microscopy. Skin lesions were swabbed with a sterile applicator and the pleural  
563 surface of each lung sample was seared with a hot scalpel blade, and a sterile microbial loop  
564 was inserted into the deeper tissue to inoculate horse blood agar (HBA) and MacConkey agar  
565 (MAC) (Thermo Fisher Scientific, Scoresby, Victoria, Australia), which were incubated at  
566  $35^{\circ}\text{C}$  in 4.5% carbon dioxide for 24–48 h. Isolates were identified with API 20 NE  
567 identification kits (bioMerieux SA, Lyon, France) using manufacturer’s instructions.

568

569 **Sample preparation, library construction and virus discovery.** Tissue samples were  
570 homogenised using 2.38 mm metal beads (Qiagen) in the TissueLyser LT (Qiagen). Total  
571 RNA was extracted using the RNeasy Plus Mini Kit (Qiagen) following the manufacturer's  
572 protocol. Extracted RNA was pooled according to the syndrome, tissue type and bat species  
573 (Table S1). Sequencing libraries were constructed using the Illumina Stranded Total RNA  
574 Prep with Ribo-Zero Plus (Illumina) preparation kit after the removal of rRNA. Libraries  
575 were sequenced on the Illumina NovaSeq platform as 150 bp paired end reads at the  
576 Australian Genome Research Facility (AGRF, Melbourne). Sequencing reads that contained  
577 read ends with a phred score below 25 and adapter sequences were quality trimmed using  
578 cutadapt version 1.8.3 (44). Trimmed reads were then *de novo* assembled into contigs using  
579 Megahit version 1.1.3 (45, 46). The resulting contigs were then compared to the non-  
580 redundant protein database using Diamond version 2.0.9 with an e-value cut-off of  $1E^{-5}$ .  
581 Hervey pteropid gammaretrovirus was identified using an in-house retrovirus discovery  
582 pipeline (W.S Chang, A.S Baez-Ortiz, J.E Mahar, E.C Holmes, C Le Lay, K Rose and C  
583 Blaker, manuscript in preparation). Attempts to extend virus contigs were made by using a  
584 reassembling megahit contigs using a Geneious version 2022.1.1 assembler.  
585  
586 **Taxonomy profiling and abundance calculation.** Taxonomic assignment and abundance  
587 information for bacterial, fungal and metazoan contigs was accessed using CCMetagen  
588 version 1.2.4 (18) and kma version 1.2.4 (47). Taxonomic information for viral contigs was  
589 retrieved from the protein database results. Read abundance values for the virus contigs and  
590 COX1 genes (accession no. KF726143 for *Pteropus* species, MK410364 for the eastern bent-  
591 wing bat and a COX1 contig identified in the large-footed myotis library) were calculated by  
592 mapping trimmed sequencing reads using the RSEM version 1.3.2 tool (48) in Trinity and  
593 Bowtie2 version 2.3.3.1 (49, 50). The 16S rRNA genes from the *P. aeruginosa* in the bat

594 lung and skin libraries were obtained by mapping trimmed reads to a *P. aeruginosa* 16S  
595 rRNA gene available on NCBI GenBank (accession no. CP003149) and extracting the 0%  
596 majority consensus (i.e., least ambiguities in sequence) using Geneious version 2022.1.1.

597

598 **Phylogenetic analysis.** Amino acid and nucleotide alignments of virus genes were generated  
599 using MAFFT version 7.450 and the E-INS-I algorithm (51), with ambiguously aligned  
600 regions removed using the gappyout method in TrimAL version 1.4.1 (52). The model finder  
601 program (53) in IQ-TREE version 1.6.7 (54) was used to determine the best-fit models of  
602 amino acid and nucleotide substitution and the same program was used to infer maximum  
603 likelihood trees. Ultrafast bootstrapping with 1000 replicates was to provide an indication of  
604 nodal support, and the nearest neighbour interchange was applied to search for optimal tree  
605 structure (55).

606

607 **Data availability.** The sequencing data for this study are available on the NCBI Sequence  
608 Read Archive database under the BioProject no. PRJNA885898 and SRA no. SRR21780604  
609 – SRR21780623. The virus genomes have been deposited on NCBI GenBank under the  
610 accession no. OP589976-OP589993.

611

## 612 **ACKNOWLEDGEMENTS**

613 We thank Natalie Miller and Paul Thompson, Taronga Wildlife Hospital, for the  
614 microbiological examination of tissue samples. We are grateful for the care and expertise  
615 exhibited by those responding to injured bats, including Meg Churches, Storm Stanford,  
616 Sarah Curran - Wildlife Information, Rescue, and Education Service (WIRES), Dr. Kerry  
617 Parry-Jones – Wildlife Animal Rescue and Care, Dr. Stephen Deist – Pacific Vet Care and  
618 Mid-North Coast WIRES, Erin Stokes and Dr. Amber Brett - North Nowra Vet Hospital and

619 Wildlife Rescue South Coast, Dr. Louise Hayles - Kippax Veterinary Hospital, Denise Kay –  
620 ACT Wildlife, Sandra Guy – Sydney Wildlife Rescue, and Drs. John Martin, and Phil  
621 Kemsley. Taronga Conservation Society Australia is acknowledged for ongoing funding of  
622 the Australian Registry of Wildlife Health. This project received funding from the Australian  
623 Government’s Wildlife Rescue and Rehabilitation initiative, and by an Australian Research  
624 Council Australian Laureate Fellowship to ECH (FL170100022).

625

## 626 REFERENCES

- 627 1. Mollentze N, Streicker DG. 2020. Viral zoonotic risk is homogenous among taxonomic  
628 orders of mammalian and avian reservoir hosts. *Proc Natl Acad Sci USA* 117:9423-  
629 9430.
- 630 2. Zhou H, Ji J, Chen X, Bi Y, Li J, Wang Q, Hu T, Song H, Zhao R, Chen Y, Cui M,  
631 Zhang Y, Hughes AC, Holmes EC, Shi W. 2021. Identification of novel bat  
632 coronaviruses sheds light on the evolutionary origins of SARS-CoV-2 and related  
633 viruses. *Cell* 184:4380-4391.e14.
- 634 3. Wu Z, Yang L, Ren X, He G, Zhang J, Yang J, Qian Z, Dong J, Sun L, Zhu Y, Du J,  
635 Yang F, Zhang S, Jin Q. 2016. Deciphering the bat virome catalog to better understand  
636 the ecological diversity of bat viruses and the bat origin of emerging infectious diseases.  
637 *ISME J* 10:609-20.
- 638 4. Wang J, Anderson DE, Halpin K, Hong X, Chen H, Walker S, Valdeter S, van der Heide  
639 B, Neave MJ, Bingham J, O'Brien D, Eagles D, Wang LF, Williams DT. 2021. A new  
640 Hendra virus genotype found in Australian flying foxes. *Virology* 18:197.
- 641 5. Mishra N, Fagbo SF, Alagaili AN, Nitido A, Williams SH, Ng J, Lee B, Durosinlorun A,  
642 Garcia JA, Jain K, Kapoor V, Epstein JH, Briese T, Memish ZA, Olival KJ, Lipkin WI.

- 643 2019. A viral metagenomic survey identifies known and novel mammalian viruses in  
644 bats from Saudi Arabia. *PLoS One* 14:e0214227.
- 645 6. Irving AT, Ahn M, Goh G, Anderson DE, Wang LF. 2021. Lessons from the host  
646 defences of bats, a unique viral reservoir. *Nature* 589:363-370.
- 647 7. Banerjee A, Baker ML, Kulcsar K, Misra V, Plowright R, Mossman K. 2020. Novel  
648 insights into immune systems of bats. *Front Immunol* 11:26.
- 649 8. Hoyt JR, Kilpatrick AM, Langwig KE. 2021. Ecology and impacts of white-nose  
650 syndrome on bats. *Nat Rev Microbiol* 19:196-210.
- 651 9. Cheng TL, Reichard JD, Coleman JTH, Weller TJ, Thogmartin WE, Reichert BE,  
652 Bennett AB, Broders HG, Campbell J, Etchison K, Feller DJ, Geboy R, Hemberger T,  
653 Herzog C, Hicks AC, Houghton S, Humber J, Kath JA, King RA, Loeb SC, Massé A,  
654 Morris KM, Niederriter H, Nordquist G, Perry RW, Reynolds RJ, Sasse DB, Scafini MR,  
655 Stark RC, Stihler CW, Thomas SC, Turner GG, Webb S, Westrich BJ, Frick WF. 2021.  
656 The scope and severity of white-nose syndrome on hibernating bats in North America.  
657 *Conserv Biol* 35:1586-1597.
- 658 10. Banyard AC, Hayman D, Johnson N, McElhinney L, Fooks AR. 2011. Bats and  
659 lyssaviruses. *Adv Virus Res* 79:239-89.
- 660 11. International Union for Conservation of Nature. 2021. The IUCN Red List of Threatened  
661 Species. <https://www.iucnredlist.org>.
- 662 12. International Union for Conservation of Nature. 2021. Data from “*Pteropus*  
663 *poliocephalus*”. The IUCN Red List of Threatened Species  
664 <https://www.iucnredlist.org/species/18751/22085511>.
- 665 13. Kolkert H, Andrew R, Smith R, Rader R, Reid N. 2020. Insectivorous bats selectively  
666 source moths and eat mostly pest insects on dryland and irrigated cotton farms. *Ecol*  
667 *Evol* 10:371-388.

- 668 14. Law BS, Lean M. 1999. Common blossom bats (*Syconycteris australis*) as pollinators in  
669 fragmented Australian tropical rainforest. *Biol Conserv* 91:201-212.
- 670 15. Moran C, Catterall CP, Kanowski J. 2009. Reduced dispersal of native plant species as a  
671 consequence of the reduced abundance of frugivore species in fragmented rainforest.  
672 *Biol conserv* 142:541-552.
- 673 16. Mo M, Roache M, Davies J, Hopper J, Pitty H, Foster N, Guy S, Parry-Jones K, Francis  
674 G, Koosmen A. 2021. Estimating flying-fox mortality associated with abandonments of  
675 pups and extreme heat events during the austral summer of 2019–20. *Pacific Conserv*  
676 *Biol* 28:124-139.
- 677 17. Welbergen JA, Klose SM, Markus N, Eby P. 2008. Climate change and the effects of  
678 temperature extremes on Australian flying-foxes. *Proc Biol Sci* 275:419-25.
- 679 18. Marcelino VR, Clausen P, Buchmann JP, Wille M, Iredell JR, Meyer W, Lund O, Sorrell  
680 TC, Holmes EC. 2020. CCMetagen: comprehensive and accurate identification of  
681 eukaryotes and prokaryotes in metagenomic data. *Genome Biol* 21:103.
- 682 19. Krishnamurthy SR, Wang D. 2018. Extensive conservation of prokaryotic ribosomal  
683 binding sites in known and novel picobirnaviruses. *Virology* 516:108-114.
- 684 20. Hayward JA, Tachedjian M, Kohl C, Johnson A, Dearnley M, Jesaveluk B, Langer C,  
685 Solymosi PD, Hille G, Nitsche A, Sánchez CA, Werner A, Kontos D, Crameri G, Marsh  
686 GA, Baker ML, Pountourios P, Drummer HE, Holmes EC, Wang LF, Smith I,  
687 Tachedjian G. 2020. Infectious KoRV-related retroviruses circulating in Australian bats.  
688 *Proc Natl Acad Sci USA* 117:9529-9536.
- 689 21. De Benedictis P, Schultz-Cherry S, Burnham A, Cattoli G. 2011. Astrovirus infections in  
690 humans and animals - molecular biology, genetic diversity, and interspecies  
691 transmissions. *Infect Genet Evol* 11:1529-44.

- 692 22. Yinda CK, Zeller M, Conceição-Neto N, Maes P, Deboutte W, Beller L, Heylen E,  
693 Ghogomu SM, Van Ranst M, Matthijnsens J. 2016. Novel highly divergent reassortant  
694 bat rotaviruses in Cameroon, without evidence of zoonosis. *Sci Rep* 6:34209.
- 695 23. Li L, Victoria JG, Wang C, Jones M, Fellers GM, Kunz TH, Delwart E. 2010. Bat guano  
696 virome: predominance of dietary viruses from insects and plants plus novel mammalian  
697 viruses. *J Virol* 84:6955-65.
- 698 24. Cobbin JC, Charon J, Harvey E, Holmes EC, Mahar JE. 2021. Current challenges to  
699 virus discovery by meta-transcriptomics. *Curr Opin Virol* 51:48-55.
- 700 25. Hardmeier I, Aeberhard N, Qi W, Schoenbaechler K, Kraettli H, Hatt JM, Fraefel C,  
701 Kubacki J. 2021. Metagenomic analysis of fecal and tissue samples from 18 endemic bat  
702 species in Switzerland revealed a diverse virus composition including potentially  
703 zoonotic viruses. *PLoS One* 16:e0252534.
- 704 26. Van Brussel K, Mahar JE, Ortiz-Baez AS, Carrai M, Spielman D, Boardman WSJ, Baker  
705 ML, Beatty JA, Geoghegan JL, Barrs VR, Holmes EC. 2022. Faecal virome of the  
706 Australian grey-headed flying fox from urban/suburban environments contains novel  
707 coronaviruses, retroviruses and sapoviruses. *Virology* 576:42-51.
- 708 27. Simpson KMJ, Mor SM, Ward MP, Walsh MG. 2019. Divergent geography of  
709 *Salmonella wangata* and *Salmonella typhimurium* epidemiology in New South Wales,  
710 Australia. *One Health* 7:100092.
- 711 28. Moradali MF, Ghods S, Rehm BH. 2017. *Pseudomonas aeruginosa* lifestyle: a paradigm  
712 for adaptation, survival, and persistence. *Front Cell Infect Microbiol* 7:39.
- 713 29. Reynolds D, Kollef M. 2021. The epidemiology and pathogenesis and treatment of  
714 *Pseudomonas aeruginosa* infections: an Update. *Drugs* 81:2117-2131.
- 715 30. Spervovasilis N, Psychogiou M, Poulakou G. 2021. Skin manifestations of *Pseudomonas*  
716 *aeruginosa* infections. *Curr Opin Infect Dis* 34:72-79.



- 717 31. Xu W, Eiden MV. 2015. Koala retroviruses: evolution and disease dynamics. *Annu Rev*  
718 *Viro* 2:119-34.
- 719 32. Kawakami TG, Huff SD, Buckley PM, Dungworth DL, Synder SP, Gilden RV. 1972. C-  
720 type virus associated with gibbon lymphosarcoma. *Nat New Biol* 235:170-1.
- 721 33. Boros Á, Kiss T, Kiss O, Pankovics P, Kapusinszky B, Delwart E, Reuter G. 2013.  
722 Genetic characterization of a novel picornavirus distantly related to the marine mammal-  
723 infecting aquamaviruses in a long-distance migrant bird species, European roller  
724 (*Coracias garrulus*). *J Gen Virol* 94:2029-2035.
- 725 34. Buechler CR, Bailey AL, Lauck M, Heffron A, Johnson JC, Campos Lawson C, Rogers  
726 J, Kuhn JH, O'Connor DH. 2017. Genome sequence of a novel *Kunsagivirus*  
727 (*Picornaviridae: Kunsagivirus*) from a wild baboon (*Papio cynocephalus*). *Genome*  
728 *Announc* 5:e00261-17.
- 729 35. Kuhn JH, Sibley SD, Chapman CA, Knowles NJ, Lauck M, Johnson JC, Lawson CC,  
730 Lackemeyer MG, Valenta K, Omeja P, Jahrling PB, O'Connor DH, Goldberg TL. 2020.  
731 Discovery of Lanama virus, a distinct member of species *Kunsagivirus C*  
732 (*Picornavirales: Picornaviridae*), in wild vervet monkeys (*Chlorocebus pygerythrus*).  
733 *Viruses* 12:1436.
- 734 36. de Wit JJ, Dam GB, de Laar JM, Biermann Y, Verstegen I, Edens F, Schrier CC. 2011.  
735 Detection and characterization of a new astrovirus in chicken and turkeys with enteric  
736 and locomotion disorders. *Avian Pathol* 40:453-61.
- 737 37. Oude Munnink BB, Cotten M, Canuti M, Deijns M, Jebbink MF, van Hemert FJ, Phan  
738 MV, Bakker M, Jazaeri Farsani SM, Kellam P, van der Hoek L. 2016. A novel  
739 astrovirus-like RNA virus detected in human stool. *Virus Evol* 2:vew005.
- 740 38. Lacroix A, Duong V, Hul V, San S, Davun H, Omaliss K, Chea S, Hassanin A,  
741 Theppangna W, Silithammavong S, Khammavong K, Singhalath S, Afelt A, Greatorex

- 742 Z, Fine AE, Goldstein T, Olson S, Joly DO, Keatts L, Dussart P, Frutos R, Buchy P.  
743 2017. Diversity of bat astroviruses in Lao PDR and Cambodia. *Infect Genet Evol* 47:41-  
744 50.
- 745 39. Fischer K, Zeus V, Kwasnitschka L, Kerth G, Haase M, Groschup MH, Balkema-  
746 Buschmann A. 2016. Insectivorous bats carry host specific astroviruses and  
747 coronaviruses across different regions in Germany. *Infect Genet Evol* 37:108-16.
- 748 40. Kemenesi G, Dallos B, Görföl T, Boldogh S, Estók P, Kurucz K, Kutas A, Földes F,  
749 Oldal M, Németh V, Martella V, Bányai K, Jakab F. 2014. Molecular survey of RNA  
750 viruses in Hungarian bats: discovering novel astroviruses, coronaviruses, and  
751 caliciviruses. *Vector Borne Zoonotic Dis* 14:846-55.
- 752 41. Zhu HC, Chu DKW, Liu W, Dong BQ, Zhang SY, Zhang JX, Li LF, Vijaykrishna D,  
753 Smith GJD, Chen HL, Poon LLM, Peiris JSM, Guan Y. 2009. Detection of diverse  
754 astroviruses from bats in China. *J Gen Virol* 90:883-887.
- 755 42. Fischer K, Pinho Dos Reis V, Balkema-Buschmann A. 2017. Bat astroviruses: towards  
756 understanding the transmission dynamics of a neglected virus family. *Viruses* 9:34.
- 757 43. Chandriani S, Skewes-Cox P, Zhong W, Ganem DE, Divers TJ, Van Blaricum AJ,  
758 Tennant BC, Kistler AL. 2013. Identification of a previously undescribed divergent virus  
759 from the *Flaviviridae* family in an outbreak of equine serum hepatitis. *Proc Natl Acad*  
760 *Sci USA* 110:E1407-15.
- 761 44. Kechin A, Boyarskikh U, Kel A, Filipenko M. 2017. cutPrimers: a new tool for accurate  
762 cutting of primers from reads of targeted next generation sequencing. *J Comput Biol*  
763 24:1138-1143.
- 764 45. Li D, Liu CM, Luo R, Sadakane K, Lam TW. 2015. MEGAHIT: an ultra-fast single-  
765 node solution for large and complex metagenomics assembly via succinct de Bruijn  
766 graph. *Bioinformatics* 31:1674-6.

- 767 46. Li D, Luo R, Liu CM, Leung CM, Ting HF, Sadakane K, Yamashita H, Lam TW. 2016.  
768 MEGAHIT v1.0: A fast and scalable metagenome assembler driven by advanced  
769 methodologies and community practices. *Methods* 102:3-11.
- 770 47. Clausen P, Aarestrup FM, Lund O. 2018. Rapid and precise alignment of raw reads  
771 against redundant databases with KMA. *BMC Bioinformatics* 19:307.
- 772 48. Li B, Ruotti V, Stewart RM, Thomson JA, Dewey CN. 2010. RNA-Seq gene expression  
773 estimation with read mapping uncertainty. *Bioinformatics* 26:493-500.
- 774 49. Langmead B, Wilks C, Antonescu V, Charles R. 2019. Scaling read aligners to hundreds  
775 of threads on general-purpose processors. *Bioinformatics* 35:421-432.
- 776 50. Langmead B, Salzberg SL. 2012. Fast gapped-read alignment with Bowtie 2. *Nat*  
777 *Methods* 9:357-9.
- 778 51. Katoh K, Standley DM. 2013. MAFFT multiple sequence alignment software version 7:  
779 improvements in performance and usability. *Mol Biol Evol* 30:772-80.
- 780 52. Capella-Gutiérrez S, Silla-Martínez JM, Gabaldón T. 2009. trimAl: a tool for automated  
781 alignment trimming in large-scale phylogenetic analyses. *Bioinformatics* 25:1972-3.
- 782 53. Kalyaanamoorthy S, Minh BQ, Wong TKF, von Haeseler A, Jermin LS. 2017.  
783 ModelFinder: fast model selection for accurate phylogenetic estimates. *Nat Methods*  
784 14:587-589.
- 785 54. Nguyen L-T, Schmidt HA, von Haeseler A, Minh BQ. 2014. IQ-TREE: A fast and  
786 effective stochastic algorithm for estimating maximum-likelihood phylogenies. *Mol Biol*  
787 *Evol* 32:268-274.
- 788 55. Hoang DT, Chernomor O, von Haeseler A, Minh BQ, Vinh LS. 2017. UFBoot2:  
789 Improving the ultrafast bootstrap approximation. *Mol Biol Evol* 35:518-522.
